# Supplementary figures and images for: Similar progression of carotid intima–media thickness in 7-year surveillance of patients with mild SLE and controls, but this progression is still promoted by dyslipidaemia, lower HDL levels, hypertension, history of lupus nephritis and a higher prednisolone usage in patients
Source: PubMed Central journal article supplement — Lupus Sci Med. 2020 Jan 9;7(1):e000362. doi: 10.1136/lupus-2019-000362 (PMC7008707; doi:10.1136/lupus-2019-000362), 2020-01-09

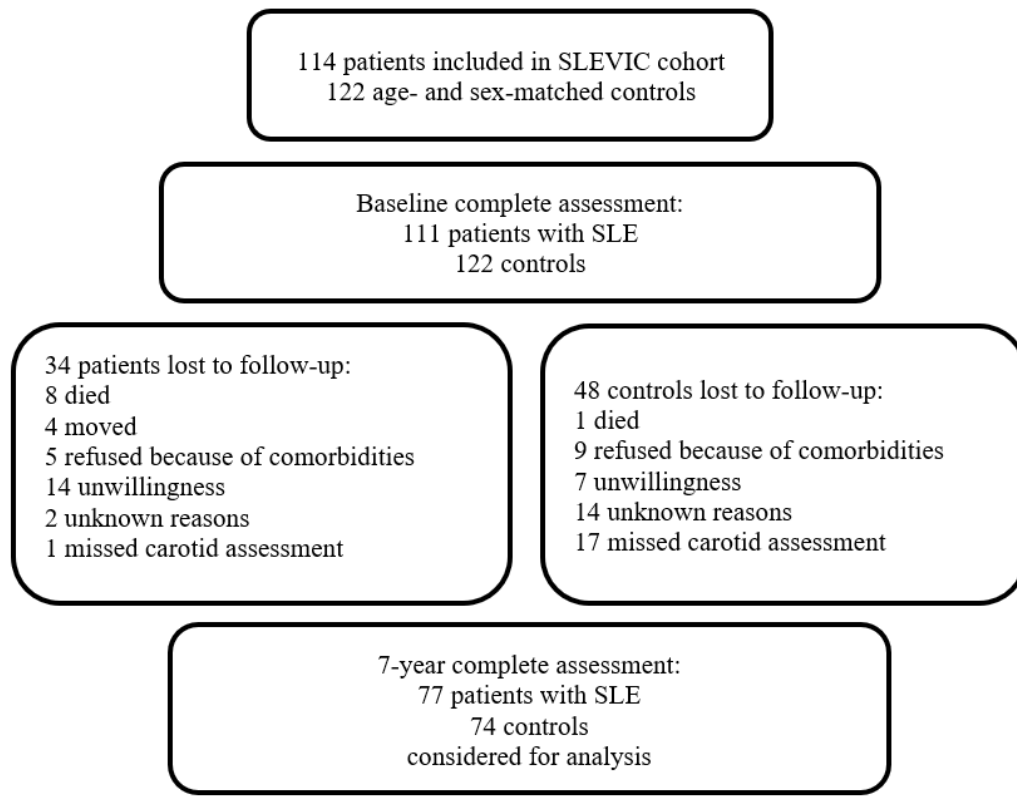

Supplement: lupus-2019-000362supp001.pdf [file lupus-2019-000362supp001.pdf]
